# Supplementary material
Source: publisher figshare collection journal article supplement (https://gsajournals.figshare.com/ndownloader/files/24115829)
Supplement: Supplementary file 1 [file 24115829]

## Sheet: Sheet1
	Table S3 Classification and associated percentage of genome masked by repetitive elements in giant sequoia v2.0
	Repeat Class	Masked % of genome
	DNA
	DNA/CMC-EnSpm	0.36161
	DNA/MuLE-MuDR	1.5537
	DNA/Sola	0.77113
	DNA/TcMar-Fot1	0.05913
	DNA/hAT-Tag1	0.47514
	DNA/hAT-Tip100	0.13902
	DNA total	3.35974
	LINE
	LINE/L1	1.77165
	LINE/L1-Tx1	0.40261
	LINE/Penelope	0.02434
	LINE/RTE-X	0.11875
	LINE/Tad1?	0.00674
	LINE total	2.32409
	LTR
	LTR	0.21792
	LTR/Copia	8.05066
	LTR/ERVK	0.46223
	LTR/Gypsy	19.6252
	LTR total	28.356
	Low complexity	0.16773
	RC/Helitron	0.07451
	Satellite	5e-05
	Simple repeat	2.03401
	Unknown	42.3455
